# Supplementary material
Source: publisher figshare collection journal article supplement (https://gsapubs.figshare.com/ndownloader/files/38066709)
Supplement: Supplementary file 1 [file 38066709]

## Sheet: Olivine profiles
Supplementary Data Table S2. Fo (=Mg/[Mg+Fe]) and Ni EPMA data for olivine profiles from the Koko Rift (Koko Crater bomb and flow, Kaupo lava flow and Kāohikaipu Island) from core to rim.
Analyzing conditions: accelerating voltage: 20 keV; beam current : 200 nA; counting times on the peak: 60 s; counting times on the background and both sides of peak: 30 s; beam size: 4 - 6 μm.
Koko bomb ol1
x (µm)	0	5.0369	10.0738	15.1002	20.0603	25.1738	30.2001	35.0726	40.101	45.1628	50.0353	55.1156	60.0826	65.0518	70.1652	75.0445	80.0643	85.128	90.0481	95.2975	100.138	105.2	110.169	115.048	120.247	125.131	135.082	140.137	145.217	149.965	155.2	160.229	165.055	170.204	175.284	180.069	185.232	190.199	195.034	200.197	205.164	210.135	215.383	220.262	225.199	230.213	235.274	240.348	245.182
Fo	84.0535	84.1154	84.1727	84.1489	84.1433	84.0915	84.1537	84.1391	84.1385	84.1379	84.1336	84.1448	84.1189	84.1202	84.1572	84.1556	84.2401	84.2416	84.1703	84.1631	84.1963	84.1829	84.2116	84.2027	84.1582	84.234	84.172	84.2266	84.2683	84.2357	84.2694	84.2737	84.269	84.25	84.313	84.2553	84.2671	84.3044	84.2726	84.3366	84.2985	84.3334	84.3605	84.4116	84.359	84.3536	84.3946	84.2921	84.2985
NiO	0.27089	0.266575	0.268207	0.265363	0.267956	0.273411	0.268008	0.272655	0.269355	0.271345	0.270726	0.270297	0.266792	0.276153	0.27091	0.272427	0.27571	0.276431	0.273938	0.270528	0.273452	0.271057	0.267843	0.273065	0.27149	0.270971	0.275142	0.267212	0.267292	0.272457	0.270743	0.27142	0.271355	0.274002	0.271257	0.264786	0.278272	0.272669	0.278015	0.276771	0.273746	0.275779	0.273907	0.276156	0.27433	0.272652	0.272253	0.278889	0.275542
Koko bomb ol2
x (µm)	0	2.94116	5.9866	8.95961	11.9326	15.0053	17.9175	21.0214	24.0572	26.9729	29.9459	32.9913	36.0019	38.975	42.0107	45.1476	47.9345	51.0012	54.0466	57.0196	60.0302	62.9714	66.2001	68.9871	72.0875	75.0286	78.0741	81.0471	84.0201	86.9026	90.0786	93.2092	96.1822	99.062	102.108	105.211	108.09	111.006	114.073	117.081	120.116	123.162	126.169	129.052	132.089	135.229	138.109	141.021
Fo	84.7715	84.8002	84.7541	84.7495	84.7332	84.7375	84.7109	84.7808	84.7852	84.7795	84.7528	84.7397	84.7323	84.6316	84.6057	84.6092	84.6137	84.6463	84.604	84.6056	84.6032	84.5956	84.5757	84.5358	84.4965	84.493	84.425	84.3447	84.2996	84.2233	84.1511	84.0571	83.9683	83.8788	83.7383	83.6628	83.4918	83.4421	83.3217	83.1906	83.0422	82.961	82.8378	82.7013	82.5992	82.5485	82.4068	82.2547
NiO	0.304375	0.301997	0.304693	0.299151	0.30121	0.302841	0.296529	0.300857	0.30434	0.303469	0.29995	0.302142	0.300247	0.299559	0.296971	0.298885	0.303307	0.301598	0.298346	0.29825	0.295873	0.300079	0.298854	0.302183	0.294776	0.294805	0.295179	0.295137	0.292802	0.292282	0.294714	0.292062	0.292384	0.287469	0.285064	0.280473	0.284978	0.281647	0.273086	0.2657	0.258357	0.25586	0.252652	0.240454	0.227935	0.218668	0.214673	0.203053
Koko bomb ol3
x (µm)	0	7.87302	15.8135	23.8757	31.9185	39.9188	47.9244	55.8305	63.8638	71.7392	79.8087	87.7785	95.8118	103.906	111.75	119.888	127.95	135.92	143.763	151.828	159.766	167.868	175.847	183.847	191.942	199.928	208.054	215.992	223.999	231.971	239.758	247.858	255.922	263.958	271.956
Fo	84.2143	84.1791	84.1769	84.1962	84.241	84.2587	84.2431	84.2778	84.2647	84.2837	84.2969	84.2786	84.2728	84.2323	84.1974	84.1304	84.0667	83.9715	83.8241	83.7416	83.5807	83.4216	83.2683	83.0671	82.8971	82.6993	82.5255	82.3784	82.2644	82.1374	82.1037	81.9917	81.9404	81.9259	61.112
NiO	0.262927	0.264679	0.264052	0.264871	0.264226	0.267016	0.267899	0.262645	0.267022	0.268721	0.26951	0.265192	0.270522	0.267137	0.265787	0.265173	0.260531	0.266871	0.263535	0.255733	0.257278	0.247175	0.244015	0.237264	0.231881	0.227919	0.215135	0.20965	0.203982	0.195729	0.190852	0.190031	0.185869	0.179258	0.026652
Koko bomb ol4
x (µm)	0	3.9978	7.99561	12.1002	15.9988	19.9966	24.1013	28.0991	32.0981	36.2027	40.1013	44.1995	48.2062	52.2052	56.2043	60.2021	64.2075	68.2053	72.2031	76.2085	80.1084	84.2054	88.2032	92.1094	96.2064	100.006	104.111	108.108	112.007	116.005	120.01	124.008	128.006	132.11	136.01	140.008	144.006	148.011	152.009	156.007	160.005	164.01	168.107	172.006	176.011	180.009	184.008	188.006	192.011
Fo	83.8968	83.8702	83.8711	83.8871	83.8493	83.8451	83.8655	83.8485	83.7743	83.7937	83.7672	83.7566	83.7418	83.7512	83.7696	83.762	83.7236	83.7124	83.6873	83.7107	83.6873	83.6491	83.6085	83.612	83.5646	83.5267	83.4846	83.526	83.4694	83.426	83.4286	83.3782	83.2815	83.2804	83.2445	83.2115	83.1377	83.0949	83.0482	83.0009	82.9488	82.9269	82.8764	82.7714	82.7155	82.6546	82.6378	82.6123	82.5582
NiO	0.274614	0.275737	0.272933	0.275134	0.273068	0.269488	0.270635	0.272434	0.268201	0.271196	0.275435	0.277165	0.278198	0.276187	0.27809	0.277462	0.27784	0.275966	0.281813	0.271073	0.275869	0.277937	0.28015	0.278551	0.281906	0.272716	0.274796	0.276838	0.273213	0.275963	0.274037	0.276386	0.275298	0.278722	0.275737	0.276108	0.27324	0.270896	0.27066	0.268397	0.271729	0.267941	0.265656	0.258732	0.256675	0.253505	0.252246	0.247662	0.242476
Koko bomb ol5
x (µm)	0	7.9456	15.9155	23.9777	31.7948	39.9814	47.7985	55.9342	63.9345	71.9678	79.8801	87.9796	95.8919	103.925	111.866	119.928	127.876	135.938	143.878	151.912	159.912	167.925	175.989	183.928	192.058	199.902	207.973	215.912	224.006	231.821	239.959	247.897	255.962	263.9	271.87	279.932	287.947	295.885	303.95	311.888	319.96	327.898	335.744
Fo	84.3774	84.3289	84.3408	84.3648	84.3646	84.3412	84.3619	84.3843	84.4217	84.4204	84.4389	84.4402	84.4332	84.4701	84.4392	84.4155	84.424	84.4442	84.4621	84.4353	84.4409	84.4695	84.4412	84.4499	84.4532	84.4186	84.4335	84.3724	84.3942	84.3865	84.3336	84.2763	84.2189	84.0912	83.9293	83.6561	83.3101	82.8541	82.3889	81.6425	56.7916	16.4123	30.1213
NiO	0.272771	0.274484	0.271549	0.27381	0.266351	0.270453	0.270555	0.267163	0.267734	0.272526	0.275943	0.273445	0.270054	0.270893	0.272774	0.274143	0.270475	0.2758	0.271839	0.271718	0.27293	0.275359	0.271256	0.272202	0.270811	0.274775	0.275835	0.278424	0.279078	0.279383	0.276467	0.278691	0.276443	0.274422	0.273001	0.268788	0.260336	0.244146	0.217228	0.179352	0.013761	0.00141	0.002902
Koko bomb ol6
x (µm)	0	4.02579	8.10307	12.0331	16.0132	19.9178	24.082	28.0433	31.9247	36.002	40.0868	44.0481	47.931	52.071	56.0323	59.937	64.119	68.0639	71.9454	76.0043	80.1097	84.071	88.0323	92.0899	96.0424	100.12	104.003	108.101	112.031	116.063	120.092	124.117	128.062	132.225	136.129	140.109	144.152	148.23
Fo	80.1039	83.8566	83.841	83.7488	83.7799	83.7134	83.7687	83.7643	83.773	83.7698	83.7917	83.7287	83.6896	83.6703	83.6061	83.5896	83.5722	83.5066	83.4627	83.4116	83.3423	83.2489	83.1735	83.1021	83.0499	82.9542	82.863	82.7969	82.6849	82.5364	82.4381	82.3406	82.2332	82.1371	82.0365	81.8927	81.8693	81.7541
NiO	0.177143	0.251145	0.256392	0.252974	0.256179	0.257819	0.255701	0.255101	0.25192	0.25978	0.255784	0.258179	0.257372	0.257447	0.258826	0.25745	0.259583	0.258334	0.260146	0.253873	0.256225	0.252728	0.254164	0.252501	0.250303	0.251542	0.244473	0.24077	0.232944	0.236002	0.234347	0.227684	0.223228	0.213088	0.208228	0.199849	0.193881	0.187552
Koko bomb ol7
x (µm)	0	3.99475	8.13909	11.995	15.8249	20.0298	23.9457	27.9511	31.9332	35.9734	39.9788	44.0385	47.9544	52.0201	55.9898	59.9906	64.0504	67.893	71.9332	75.8799	79.9896	84.0129	87.9826	91.8252	95.9866	100.032	104.014	107.936	111.918	115.9	120.04	124.009	127.871	131.931	135.93	140.046	143.962	147.882
Fo	84.1904	84.1824	84.1805	84.1884	84.1768	84.1871	84.1938	84.1864	84.1962	84.1833	84.1616	84.1192	84.1561	84.0836	84.1318	84.091	84.0808	84.0211	84.0003	83.9445	83.876	83.8811	83.7577	83.5944	83.6201	83.4437	83.3265	83.201	83.1257	82.9561	82.8558	82.6809	82.5985	82.4797	82.3893	82.2613	82.2172	82.082
NiO	0.27293	0.273669	0.277414	0.272606	0.280995	0.275931	0.277082	0.275298	0.28052	0.275213	0.277122	0.268171	0.270179	0.26939	0.26848	0.267747	0.271221	0.27013	0.266405	0.266666	0.267124	0.266895	0.265887	0.270515	0.268305	0.260296	0.255124	0.254079	0.249315	0.242721	0.236087	0.232434	0.223549	0.215733	0.209192	0.203837	0.192043	0.191907
Koko bomb ol8
x (µm)	0	4.94032	9.97313	14.9107	19.9827	25.0898	30.0301	34.9705	39.9865	44.9268	50.1254	54.9008	60.0507	64.991	69.9683	75.0011	79.9784	84.9558	100.003	110.09	115.106	119.977	125.085	129.919	135.081	140.206	145.183	150.124	155.14	160.08	165.149	175.159	180.168	185.108	190.177	195.154	200.06	205.129	210.161	215.218	220.158	225.098	230.26	235.145	240.178	245.194	250.172	255.204	260.13
Fo	88.4332	88.4033	88.401	88.3921	88.3867	88.3647	88.3777	88.3185	88.364	88.3161	88.3671	88.3279	88.3523	88.3203	88.3047	88.2904	88.3046	88.2653	88.2343	88.207	88.2076	88.1743	88.024	88.1045	88.0751	88.0875	88.0383	88.0123	87.9455	87.9363	87.9111	87.8348	87.7946	87.7419	87.6749	87.6	87.5408	87.4269	87.3358	87.2484	87.1143	86.9867	86.8864	86.7881	86.4895	86.1011	85.9533	85.6937	85.4531
NiO	0.392959	0.395863	0.39076	0.396293	0.399706	0.392435	0.388623	0.381602	0.393604	0.392844	0.394299	0.395299	0.396004	0.396688	0.39455	0.389376	0.387255	0.391462	0.394253	0.387264	0.387549	0.38834	0.390024	0.389939	0.388278	0.387274	0.382333	0.38917	0.390958	0.390856	0.390108	0.39403	0.389426	0.389612	0.386364	0.385339	0.383646	0.385464	0.386108	0.380784	0.374829	0.376951	0.378093	0.385554	0.381831	0.369937	0.369677	0.364092	0.358986
Koko bomb ol9
x (µm)	0	8.06105	15.9819	24.0521	32.0446	40.0371	48.1018	56.0226	63.9475	72.1524	80.0021	88.0668	96.1371	103.989	112.12	120.044	128.037	135.894	144.099	151.946	160.077	167.94	176.001	184.065	191.918	200.196	207.977	216.041	224.101	232.022	239.948	248.085	255.935	264	271.936	279.996	287.988
Fo	81.9626	81.9622	81.9799	81.9592	81.9719	81.9444	81.922	81.9189	81.9091	81.8738	81.8304	81.7928	81.7823	81.7414	81.6952	81.6211	81.6185	81.6139	81.5594	81.5359	81.5468	81.4871	81.5074	81.4983	81.5166	81.4765	81.5414	81.5002	81.5169	81.5372	81.5677	81.5538	81.5838	81.6365	81.8324	58.4485	24.0732
NiO	0.235255	0.231198	0.228898	0.227582	0.225146	0.232134	0.22894	0.229189	0.226769	0.224819	0.22159	0.217014	0.218188	0.211811	0.211641	0.20751	0.200424	0.194328	0.198443	0.192004	0.188456	0.187062	0.184438	0.181425	0.186683	0.184932	0.181211	0.18305	0.1813	0.176991	0.187447	0.182604	0.184213	0.183788	0.184993	0.038353	0.005821
Koko bomb ol10
x (µm)	0	8.03677	15.8978	24.0754	32.0424	40.0291	48.0945	56.067	64.0471	72.035	80.0887	88.0612	96.1535	104.042	112.096	120.182	128.162	136.11	144.104	152.063	160.05	168.129	176.208	184.096	192.189	200.148	208.122	216.066	224.159
Fo	83.1124	83.1271	83.1291	83.1075	83.0787	83.067	83.1429	83.1584	83.1623	82.9998	82.7266	82.6428	82.6418	82.5775	82.5068	82.4778	82.4015	82.2707	82.2448	82.1403	82.097	82.0007	81.9465	81.9189	81.8895	81.8891	82.0134	71.1639	58.5788
NiO	0.256605	0.257436	0.255025	0.250473	0.250041	0.250488	0.247201	0.246309	0.24938	0.245408	0.239542	0.241202	0.239009	0.228418	0.230078	0.228911	0.219505	0.216744	0.210833	0.207171	0.199066	0.192819	0.192055	0.186535	0.187143	0.185084	0.183846	0.077865	0.004127
Koko flow 1
x (µm)	0	5.05636	10.0337	15.0477	20.1584	25.0407	30.0986	35.0759	40.0533	45.0693	50.0818	55.0591	60.0767	65.0927	70.1998	75.0856	80.1436	85.0258	90.095	95.0202	100.036	105.015	110.162	115.044	120.021	125.037	130.055	135.032	140.01	145.066	150.045	154.966	160.204	165.052	170.068
Fo	83.5094	83.4461	83.4264	83.4025	83.3908	83.3241	83.2718	83.2346	83.1861	83.1707	83.0713	83.0061	82.9163	82.842	82.7671	82.7343	82.5699	82.4916	82.4081	82.2686	82.0411	81.8667	81.4668	80.9702	80.3792	79.6673	78.8381	77.8104	76.9015	75.6923	74.4041	72.615	70.2936	65.689	57.1709
NiO	0.256691	0.254336	0.258393	0.253351	0.248436	0.25124	0.251275	0.247926	0.2458	0.241301	0.242205	0.238123	0.235657	0.232262	0.223259	0.224006	0.220582	0.21837	0.214025	0.213704	0.205118	0.202742	0.199093	0.192814	0.19199	0.183158	0.172595	0.171122	0.161873	0.147869	0.137487	0.131409	0.096096	0.081096	0.063225
Koko flow 2
x (µm)	0	5.16123	10.2904	15.1726	20.2054	25.2215	30.2807	35.247	40.1186	45.3171	50.1293	55.0545	60.273	65.289	70.1941	75.1714	80.2405	85.2178	90.2507	95.191	100.298	105.166	110.091	115.089	120.106	125.231	130.208	135.241	140.257	145.198	150.267	155.207	160.205	165.221	170.162	175.139	180.137	185.244	190.147	195.257	200.197	205.25	210.252	215.247	220.263	225.165	230.275	235.178	240.237
Fo	84.1763	84.2009	84.1748	84.1844	84.1351	84.2068	84.1747	84.1653	84.1732	84.1662	84.1366	84.1294	84.1424	84.0902	84.0927	84.0701	84.0729	84.0667	84.0256	83.9713	83.9421	83.9043	83.8515	83.7741	83.7625	83.6558	83.6268	83.5695	83.3929	83.378	83.2653	83.1552	83.0683	83.0049	82.8454	82.7844	82.6828	82.5815	82.4833	82.3952	82.2922	82.2753	82.1661	82.0953	81.9956	81.839	81.5212	80.9579	79.9753
NiO	0.264568	0.259873	0.25808	0.263607	0.262633	0.265839	0.26631	0.262062	0.264376	0.262545	0.257899	0.262064	0.262783	0.264227	0.262641	0.265783	0.266387	0.261923	0.26618	0.259872	0.260662	0.257978	0.260659	0.262072	0.262647	0.260848	0.259481	0.259276	0.252466	0.249487	0.247426	0.244832	0.23664	0.22968	0.229998	0.219848	0.218134	0.217657	0.204329	0.205673	0.197543	0.199454	0.192006	0.186532	0.18877	0.180618	0.18241	0.179335	0.18011
Koko flow 3
x (µm)	0	4.85644	9.90419	14.8935	19.8869	24.7972	29.8743	34.8148	39.8625	44.856	49.881	54.8465	59.9196	64.7236	69.8271	74.9885	79.7925	84.8959	89.8893	94.8298	99.9604	104.867	109.944	114.854	119.847	124.924	129.865	134.83	139.824	144.849	149.814	154.945	159.661	164.708	169.786	174.811	179.776	184.856
Fo	81.7323	81.7324	81.7328	81.7698	81.7355	81.7505	81.7768	81.7381	81.7365	81.7295	81.7528	81.7465	81.7467	81.7347	81.7561	81.7347	81.7632	81.7349	81.7423	81.7653	81.7346	81.7385	81.7061	81.7362	81.7322	81.7269	81.7096	81.627	81.5379	81.4103	81.1919	80.7288	79.7861	78.6393	76.8199	74.937	71.8414	63.4609
NiO	0.201368	0.196586	0.197359	0.197793	0.195449	0.193663	0.197601	0.192228	0.197701	0.201662	0.199265	0.196599	0.197141	0.192873	0.201313	0.197031	0.197708	0.196464	0.193673	0.193529	0.19224	0.195843	0.194916	0.191268	0.193175	0.195155	0.194756	0.19241	0.191058	0.189584	0.183545	0.186495	0.174982	0.169647	0.166624	0.135434	0.116128	0.097576
Koko flow 5
x (µm)	0	7.92818	16.0787	24.0735	32.084	40.0764	48.1447	55.8727	64.0775	72.0749	80.0088	87.937	96.0078	104.011	111.866	120.01	128.006	136.01	144.073	152.009	160.004	168.014	175.936	183.941	192.079	200.214	207.936	215.939	224.077	232.072	240.008	247.936	255.864	263.935	272.006	279.927	287.864	296.001	304.019	312.012	319.949	328.011	336.087	344.012	351.94	360.016	368.011	375.936	383.87
Fo	84.4303	84.4273	84.4412	84.4305	84.4229	84.4267	84.4055	84.4139	84.4017	84.3724	84.3352	84.3215	84.2701	84.2257	84.2232	84.1722	84.1044	84.0629	83.9954	83.8968	83.8864	83.7844	83.7289	83.6511	83.5709	83.4681	83.4	83.2726	83.1849	83.1391	82.9845	82.8884	82.82	82.7674	82.6998	82.6091	82.4948	82.3186	82.4395	82.2681	82.2246	82.1655	82.0893	81.8366	81.9004	81.5809	80.9987	79.9663	78.5299
NiO	0.297197	0.295318	0.297394	0.299727	0.299539	0.29786	0.295045	0.29415	0.292717	0.29474	0.292078	0.289514	0.290774	0.283225	0.279439	0.282372	0.278238	0.278231	0.278587	0.273084	0.265577	0.265873	0.263511	0.26185	0.259515	0.254611	0.245965	0.247377	0.242854	0.23911	0.240821	0.229183	0.231056	0.22376	0.22259	0.210502	0.209394	0.206691	0.204965	0.201736	0.193683	0.193472	0.193159	0.190194	0.189165	0.187997	0.178041	0.181235	0.177082
Koko flow 6
x (µm)	0	4.85089	9.84983	14.9722	19.9027	24.9314	29.9304	34.9972	40.026	44.949	49.7877	55.0313	60.0893	65.0614	69.9123	74.9704	79.9174	85.019	90.1132	94.9631	99.9908	104.963	109.962	114.941	119.94	125.008	130.007	135.101	140.081	145.08	149.955	154.927	160.175	165.025	169.997	174.901	180.098	185.125	190.072	195.071	200.017	205.052	210.12	214.996	220.055	225.098	230.192	235.076	240.075
Fo	84.3368	84.3875	84.3979	84.4054	84.4312	84.3767	84.4193	84.4143	84.4024	84.3971	84.4081	84.3894	84.3777	84.3969	84.3832	84.4126	84.3538	84.3655	84.3297	84.2875	84.2678	84.2609	84.2433	84.1857	84.1778	84.1518	84.1172	84.0365	83.9739	83.9061	83.8667	83.7927	83.7012	83.6269	83.5152	83.4383	83.3702	83.242	83.1229	83.0145	82.9383	82.8423	82.7298	82.6356	82.5224	82.395	82.2519	82.1061	81.8565
NiO	0.298288	0.302279	0.301216	0.297018	0.296158	0.302201	0.302069	0.30379	0.300546	0.29942	0.3014	0.301054	0.3033	0.301651	0.298681	0.297041	0.297474	0.295487	0.29867	0.296929	0.296898	0.298278	0.29411	0.292196	0.291047	0.290424	0.28289	0.284378	0.280815	0.279852	0.282177	0.281587	0.277243	0.277287	0.270615	0.271732	0.270007	0.258792	0.261446	0.255634	0.253777	0.245816	0.240586	0.237363	0.227573	0.219685	0.20963	0.212999	0.206352
Koko flow 7
x (µm)	0	5.01067	10.0214	15.0374	20.048	24.9613	30.0192	35.1192	39.9958	45.1441	50.0641	55.0251	59.9017	65.0017	69.968	75.0679	80.0358	84.961	90.0552	94.8114	99.9123	105.061	110.117	115.042	120.002	125.013	129.938	134.993	139.961	145.061	150.021	154.946	159.956	165.014	170.023	174.86	180.002	184.921	189.93
Fo	84.3891	84.303	84.3276	84.3883	84.3703	84.3435	84.3969	84.4197	84.3926	84.3593	84.3569	84.338	84.3114	84.3198	84.3145	84.2663	84.2449	84.1646	84.1077	84.0337	84.0024	83.9209	83.8351	83.7136	83.6043	83.5123	83.3341	83.178	83.063	82.8215	82.5947	82.2356	81.6622	80.6278	79.2028	77.559	75.1632	72.3084	63.6825
NiO	0.290344	0.290229	0.288941	0.289683	0.293527	0.287351	0.294452	0.290082	0.291918	0.288698	0.289799	0.28705	0.291526	0.287035	0.290932	0.287468	0.290049	0.284832	0.285772	0.285381	0.286689	0.285729	0.282273	0.276091	0.283046	0.279438	0.271453	0.263074	0.261498	0.251416	0.24258	0.233162	0.221261	0.207213	0.196219	0.187079	0.145097	0.124664	0.100287
Koko flow 8
x (µm)	0	5.01602	10.0852	15.0975	20.1865	25.0629	30.0033	35.15	39.9981	45.1449	50.1222	55.1914	60.0772	65.1843	70.1616	75.2145	80.1548	85.2144	90.2304	95.1354	100.282	105.073	110.18	115.158	120.214	125.062	130.212	135.15	140.26	145.2	150.163	155.196	160.205	165.11	170.298	175.238
Fo	81.5288	81.5082	81.5629	81.585	81.5514	81.5186	81.5518	81.5823	81.5636	81.5443	81.5538	81.5742	81.5686	81.5791	81.5649	81.5961	81.5876	81.5785	81.5786	81.5747	81.6019	81.5838	81.587	81.5673	81.5532	81.5079	81.3652	81.0937	80.6952	79.9707	79.0548	77.7146	76.3814	74.5447	71.5973	61.1991
NiO	0.196867	0.197487	0.197236	0.194698	0.197568	0.199589	0.195	0.190965	0.196617	0.198051	0.198038	0.197767	0.197662	0.197577	0.195328	0.198821	0.196782	0.20122	0.194803	0.192561	0.191245	0.191652	0.19425	0.192659	0.195277	0.195315	0.195795	0.188326	0.189782	0.187402	0.18024	0.180228	0.173535	0.137464	0.125207	0.106501
Koko flow 9
x (µm)	0	4.92664	10.0478	14.9498	25.0527	29.9173	35.0248	39.9431	45.0642	49.9848	54.9701	60.0142	65.0583	70.04	75.0841	80.1316	85.0522	90.0339	95.0756	100.12	105.101	110.026	115.209	120.13	125.251	130.153	135.219	140.201	145.242	150.163	155.131	160.116	165.084	170.083	175.051	180.109	185.09	190.078	195.057	200.165	205.165	210.005	215.132	220.176
Fo	80.4911	80.6537	80.8391	81.0443	81.4443	81.5794	81.6578	81.7544	81.7744	81.8146	81.8	81.8088	81.7774	81.7974	81.7698	81.7635	81.7258	81.7084	81.7226	81.7158	81.7403	81.6618	81.7357	81.7036	81.7158	81.706	81.6741	81.6968	81.7366	81.7451	81.7901	81.8166	81.8165	81.8843	81.8723	81.8981	81.8084	81.6069	81.0948	80.3986	79.0647	77.2478	75.2718	71.896
NiO	0.192927	0.196315	0.199447	0.198119	0.206129	0.209067	0.215435	0.212945	0.21732	0.216401	0.213392	0.213305	0.218354	0.215693	0.212355	0.212698	0.213666	0.21155	0.210775	0.212236	0.20885	0.211684	0.208852	0.205576	0.206036	0.207932	0.201181	0.199205	0.199549	0.198024	0.200395	0.194218	0.197782	0.18926	0.192239	0.192186	0.187822	0.189552	0.192314	0.185688	0.188366	0.188368	0.16051	0.142497
Koko flow 10
x (µm)	0	5.02213	10.0993	15.0648	20.0303	25.0237	35.008	40.0883	45.0507	50.0162	55.064	60.1117	65.0773	70.0994	75.0928	80.0583	85.1618	90.1242	95.1176	100.083	105.049	110.042	115.09	120.055	125.103	130.151	135.113	140.079	145.127	150.092	155.14	160.105	165.071	170.064	174.967	180.075	185.04	190.088	194.912	200.101	205.149	209.973	215.162	220.043	225.091	230.139	235.045
Fo	81.3366	81.5324	81.5807	81.6682	81.7913	81.8456	81.7154	81.8969	81.9694	82.0028	82.0456	82.0558	82.0509	82.0677	82.0659	82.0791	82.0224	82.0504	81.9988	81.9967	81.9952	81.9753	81.972	81.9034	81.9196	81.8796	81.8113	81.7696	81.6603	81.5559	81.3801	81.1911	80.8631	80.5802	80.1368	79.6369	79.0957	78.3361	77.6106	76.7807	75.9449	74.9302	73.8987	72.6837	71.4345	70.5171	69.8752
NiO	0.190808	0.191192	0.190601	0.192074	0.19336	0.195281	0.200346	0.203992	0.20573	0.200958	0.202365	0.201473	0.199377	0.197662	0.203541	0.198311	0.201205	0.200362	0.203257	0.201513	0.199689	0.200896	0.200119	0.198034	0.200982	0.197443	0.193971	0.195589	0.194884	0.19495	0.192393	0.191934	0.185753	0.183739	0.183442	0.181518	0.17807	0.169689	0.166482	0.160099	0.157282	0.141129	0.135374	0.132114	0.11927	0.113948	0.092394
Koko flow 11
x (µm)	0	4.93502	10.0202	14.9548	20.1301	24.9954	30.0634	35.0115	40.0573	45.1111	49.878	55.037	59.9927	65.1242	70.1043	75.0388	80.0453	85.0788	90.0264	94.997	100.043	105.104	110.06	115.039	119.963	125.145	130.093	134.959	140.019	145.158	150.008	155.086	160.028	165.089	170.037	175.017	180.07	185.033	190.066	195.054	205.035	209.983	215.068	220.031	225.077	229.949	235.094	240.042	244.997
Fo	83.0646	83.0723	83.0766	83.0805	83.1034	83.1335	83.1508	83.1052	83.1252	83.1212	83.0868	83.0474	83.0453	83.0054	83.001	82.9207	82.8963	82.856	82.8359	82.8035	82.6518	82.6839	82.6837	82.6124	82.6056	82.4873	82.4179	82.4156	82.3877	82.2861	82.2677	82.2099	82.1594	82.0835	82.0293	81.9801	81.9436	81.9032	81.7935	81.6947	81.1886	80.6221	79.8709	78.9223	77.6279	76.0394	74.2133	72.0425	68.7837
NiO	0.252121	0.255886	0.250951	0.254551	0.251331	0.256022	0.252933	0.253808	0.253012	0.248684	0.250194	0.250482	0.249913	0.242838	0.248515	0.244672	0.243928	0.238118	0.237191	0.235969	0.233748	0.231654	0.230283	0.227884	0.225702	0.225418	0.223305	0.216869	0.213417	0.215239	0.209781	0.204218	0.207811	0.203228	0.201821	0.199612	0.197453	0.196811	0.190764	0.190284	0.186454	0.188339	0.189072	0.174343	0.173571	0.170649	0.148091	0.137128	0.112083
Kaupo 2
x (µm)	0	5.19241	10.1644	15.1645	20.3308	25.169	30.2141	35.3102	40.2834	45.2566	50.2286	55.2585	60.2307	65.356	70.2317	75.2049	80.1779	85.2739	90.3436	95.3437	100.22	105.22	110.193	115.193	120.166	125.358	130.331	135.304	140.333	145.21	150.182	155.182	160.374	165.322	170.16	175.353	180.301	185.33	190.206	195.25	200.25	205.347
Fo	84.3042	84.2609	84.2645	84.2618	84.2447	84.2049	84.2254	84.2452	84.231	84.2368	84.2147	84.1556	84.1367	84.079	83.9651	83.9628	83.9331	83.9201	83.8173	83.7862	83.6837	83.655	83.5493	83.5157	83.3931	83.314	83.2021	83.1406	83.03	82.9636	82.8672	82.7966	82.68	82.5593	82.5258	82.4259	82.3725	82.3134	82.2444	81.7976	79.0342	69.8062
NiO	0.297669	0.298523	0.297963	0.29303	0.298467	0.301046	0.300094	0.300102	0.296138	0.294909	0.298031	0.296152	0.295879	0.295537	0.291896	0.291881	0.293669	0.294425	0.29246	0.289292	0.287346	0.282893	0.286259	0.281605	0.283229	0.279841	0.280237	0.272413	0.25898	0.25844	0.258583	0.252063	0.243425	0.237442	0.23266	0.227409	0.220793	0.220665	0.225548	0.19735	0.198136	0.15753
Kaupo 3
x (µm)	0	4.07727	8.02192	12.1783	16.0246	20.0611	24.0221	28.051	31.9956	36.0618	39.9923	44.035	47.9794	52.0455	55.9901	60.0326	63.9517	68.0365	71.967	76.0256	80.0545	83.9989	88.1472	91.9939	96.0363	99.9809
Fo	80.3073	80.2631	80.2718	80.294	80.2959	80.2541	80.2964	80.2875	80.3094	80.3414	80.3692	80.383	80.4499	80.541	80.7555	80.6633	80.7868	80.9317	81.0882	81.2705	81.3909	81.5468	81.6059	81.2477	79.4613	75.8129
NiO	0.177327	0.178174	0.175246	0.176186	0.172435	0.181444	0.180329	0.177201	0.178495	0.174931	0.176273	0.173683	0.173371	0.171081	0.181316	0.178163	0.177905	0.176438	0.174117	0.180064	0.185295	0.182701	0.192112	0.179887	0.178301	0.164796
Kaupo 4
x (µm)	0	4.93332	10.0318	14.9027	19.8729	24.8776	29.8755	34.908	39.9408	44.8117	49.8442	54.9133	59.878	64.8553	69.9465	74.9441	79.8844	84.9169	89.9147	94.8194	100.038	105.036	109.94	114.88	119.785	124.91	129.908	135.033	139.973	144.751	149.876	154.909	160	164.997	169.937	174.842	179.782	184.908
Fo	84.8114	84.7674	84.7832	84.7728	84.751	84.7219	84.5991	84.5456	84.5196	84.5227	84.4962	84.2056	84.4693	84.4171	84.317	84.3032	84.1974	84.0832	83.9714	83.929	83.6871	83.5409	83.3652	83.1331	82.9186	82.7434	82.5636	82.427	82.2488	82.1266	82.0786	81.994	81.9406	81.7221	81.019	79.2467	75.8988	69.0771
NiO	0.305531	0.303923	0.294816	0.300965	0.30071	0.297799	0.300885	0.297126	0.297669	0.298252	0.297449	0.285668	0.28967	0.293543	0.290258	0.288454	0.284034	0.285573	0.286758	0.281115	0.268701	0.265898	0.25787	0.255928	0.243898	0.232526	0.221916	0.213216	0.210161	0.201833	0.199808	0.200569	0.195477	0.194346	0.188971	0.161268	0.149963	0.121237
Kaupo 6
x (µm)	0	5.03313	10.0464	14.9684	19.9906	25.0238	30.0446	34.959	39.9921	45.0328	50.055	55.0683	59.8838	65.0122	70.0255	74.9678	79.8913	84.9134	89.9357	94.9655	99.8798	104.803	110.031	114.965	119.88	124.92	129.934	134.963	139.878	144.9	149.922	154.952	159.985	164.9	169.94	174.953	179.974	184.811
Fo	84.7665	84.7236	84.69	84.7331	84.7236	84.6931	84.6338	84.6166	84.5934	84.5494	84.5185	84.4524	84.439	84.3285	84.1926	84.1617	84.0635	83.9721	83.8881	83.7997	83.6338	83.6015	83.464	83.294	83.1883	83.1	82.9776	82.8311	82.7616	82.649	82.5622	82.3586	82.1411	81.1623	79.7204	77.349	73.8662	69.7693
NiO	0.303212	0.302714	0.29979	0.300124	0.296228	0.299886	0.299945	0.302514	0.299695	0.294851	0.297689	0.292553	0.288779	0.288568	0.288831	0.285648	0.285138	0.278031	0.273808	0.272844	0.263837	0.258359	0.251745	0.252491	0.246276	0.241881	0.237786	0.23284	0.227667	0.225145	0.21817	0.217404	0.210676	0.202868	0.19257	0.153954	0.1349	0.110118
Kaupo 7																								0.245697	0.235732	0.228022	0.229081	0.219665	0.216331	0.205976	0.204847	0.198816	0.211481	0.205216	0.210131	0.17446	0.146422	0.104765
x (µm)	0	5.0489	10.2115	15.1765	20.2119	24.964	30.211	35.1472	40.2275	44.966	50.2274	55.0783	60.1264	64.9929	70.24	75.0911	80.14	84.99	90.2371	95.2191	100.145	105.127	110.262	115.198	120.262	125.146	130.194	135.131	140.279	145.13	150.094	155.256	160.083	165.245	169.996	175.121	180.201	185.265
Fo	84.633	84.5967	84.5689	84.6052	84.5391	84.4885	84.432	84.3646	84.3488	84.3031	84.2675	84.1876	84.1393	84.0133	83.9253	83.8453	83.7535	83.6472	83.5149	83.3856	83.1776	83.1012		82.9244	82.7625	82.7005	82.583	82.5805	82.4737	82.5108	82.3948	82.307	82.2821	82.1461	81.6746	79.6982	75.5614	69.5086
NiO	0.292954	0.294894	0.287781	0.29253	0.290375	0.29351	0.295313	0.289342	0.285634	0.288192	0.283637	0.29009	0.281628	0.281115	0.27618	0.275498	0.26955	0.272147	0.26754	0.266982	0.259643	0.257237
Kaupo 8
x (µm)	0	4.90901	10.0177	15.1219	20.0379	24.942	30.1457	35.0553	39.8593	44.968	50.0771	55.086	59.9023	65.0183	70.1184	75.0434	80.1475	85.0515	90.0555	95.0643	100.074	104.978	109.986	115.09	120.1	125.115	130.016	135.132	140.141	145.066	150.166	155.076	160.085	165.093	169.898	175.007	180.015	185.025	190.029
Fo	84.66	84.7016	84.6504	84.6629	84.683	84.6669	84.6649	84.6882	84.6578	84.6607	84.6236	84.6203	84.5985	84.5604	84.548	84.5015	84.4714	84.4226	84.4223	84.3167	84.2564	84.1859	84.1136	84.033	83.9245	83.806	83.6886	83.5754	83.4439	83.3151	83.1747	83.0412	82.89	82.7425	82.6105	82.3851	81.4571	77.5267	70.2863
NiO	0.288708	0.291034	0.292638	0.293916	0.291347	0.28721	0.28894	0.285273	0.294282	0.296156	0.291566	0.290301	0.2896	0.289989	0.288957	0.292509	0.290023	0.290926	0.286847	0.287299	0.292337	0.288431	0.286533	0.284972	0.287326	0.282527	0.280409	0.271436	0.273969	0.262704	0.256564	0.247897	0.239269	0.232778	0.222052	0.220179	0.191907	0.181772	0.130382
Kaupo 10
x (µm)	0	6.03026	11.9969	18.0272	24.0599	29.9638	35.9188	42.0161	47.9977	54.028	59.9771	66.0859	71.9898	77.9564	83.9867	90.017	95.9209	102.018	107.985	114.015	120.048	126.015	132.045	138.078	144.038	150.005	155.895	161.939	168.036	174.003	180.1
Fo	84.9527	84.9096	84.9365	84.9437	84.8954	84.9291	84.9553	84.9763	84.9914	84.9332	84.9309	84.9575	84.8672	84.8328	84.8354	84.8105	84.7537	84.6773	84.5754	84.4684	84.3044	84.1093	83.8229	83.5132	83.2202	82.861	82.4713	81.5509	76.1625	42.7882	37.2305
NiO	0.315595	0.31018	0.316188	0.310714	0.310703	0.314414	0.311927	0.316433	0.312535	0.312392	0.309941	0.30981	0.310026	0.308677	0.310583	0.314103	0.311164	0.303554	0.304861	0.303913	0.302261	0.301501	0.297657	0.286164	0.270771	0.251414	0.230236	0.209422	0.173933	0.031772	0.003594
Kaupo 11
x (µm)	0	8.11231	16.1256	24.0276	32.1399	40.1412	48.0554	56.1599	64.1657	72.1789	80.081	88.0998	96.1011	104.114	112.12	120.027	128.144	136.142	144.161	152.06	160.178	168.176	176.189	184.202	192.208	200.217	208.218	216.237	224.139	232.247	240.256	248.267	256.276	264.079	272.319	280.337	288.343	296.356
Fo	85.1006	85.1073	85.1071	85.1161	85.0605	85.073	85.0857	85.0861	85.1094	85.1186	85.0758	85.0813	85.0834	85.0637	85.0935	85.0653	85.0738	85.0322	85.0121	85.003	84.9849	84.9353	84.9461	84.9164	84.8854	84.8583	84.8179	84.7457	84.6491	84.4811	84.1786	83.721	83.2324	82.6628	80.9385	73.6518	30.809	58.164
NiO	0.311239	0.315723	0.31051	0.309029	0.304929	0.306889	0.306687	0.306934	0.315578	0.312373	0.310038	0.308895	0.311746	0.312731	0.317493	0.3164	0.315342	0.314141	0.318376	0.315035	0.309818	0.311445	0.310702	0.313173	0.310922	0.304305	0.306689	0.302053	0.300336	0.301569	0.293988	0.275463	0.25303	0.221235	0.199131	0.11515	0.003004	0.003238
Kāohikaipu 1
x (µm)	0	4.99824	10.111	15.01	20.0236	25.0324	30.0336	35.0428	40.0439	45.0422	50.051	55.0492	60.0718	65.0806	70.0788	75.08	80.0888	85.0872	90.0933	95.1071	100.015	104.913	110.032	115.137	120.043	125.041	130.055	134.957	140.065	145.071	150.085	155.082	159.989	165.097	170.104	175.208
Fo	80.4489	80.4647	80.4431	80.4488	80.4588	80.4508	80.4142	80.3929	80.3747	80.3453	80.3681	80.3277	80.3093	80.2324	80.2061	80.1156	80.0536	79.9914	79.9233	79.9063	79.8544	79.8314	79.8265	79.8035	79.8225	79.9275	79.9734	80.0913	80.2493	80.4379	80.6046	80.8283	80.9217	80.7765	78.9919	73.9853
NiO	0.216087	0.218131	0.217064	0.20701	0.210714	0.210837	0.213642	0.212251	0.208812	0.209715	0.212184	0.210485	0.210871	0.206944	0.206936	0.20467	0.20697	0.205207	0.204029	0.200837	0.197694	0.197623	0.195952	0.188904	0.182006	0.184377	0.182971	0.179747	0.186154	0.187869	0.187492	0.188863	0.193726	0.180138	0.177081	0.148483
Kāohikaipu 2
x (µm)	0	5.16537	10.0153	15.0764	20.019	25.1625	30.0278	35.0816	40.0297	45.1743	50.0099	55.051	59.9991	65.1644	70.0995	75.0476	79.9957	85.1467	90.0818	95.0619	100.005	105.05	110.013	115.059	120.015	125.061	129.995	135.049	145.044	150.098	155.144	159.981	164.928	170.08	175.141	180.097	185.044	190.09
Fo	83.2989	83.5468	83.6425	83.7427	83.8279	83.8732	83.9457	84.0029	84.0258	84.0919	83.9849	84.0437	84.0341	84.0589	84.0346	84.0411	84.0265	84.0005	83.9573	83.9517	83.9608	83.872	83.8141	83.7761	83.7343	83.6088	83.5014	83.3481	83.174	82.9239	82.5105	81.8297	80.8875	79.559	77.7018	75.2176	72.1397	67.3321
NiO	0.264395	0.266443	0.270071	0.269941	0.27312	0.271908	0.272174	0.276353	0.270253	0.273699	0.274901	0.27855	0.275992	0.273612	0.275227	0.276163	0.272797	0.276247	0.27788	0.278873	0.273104	0.274645	0.271033	0.267287	0.268806	0.267853	0.263924	0.258449	0.255211	0.247931	0.240869	0.235152	0.212053	0.20002	0.184526	0.140254	0.123449	0.101723
Kāohikaipu 3
x (µm)	0	3.97729	8.09965	11.9006	15.972	20.0435	24.1149	28.0458	31.9835	36.0697	39.9091	43.9352	48.0947	52.0449	56.16	60.1922	64.0331	68.0691	72.0531	75.9502	80.0149	84.041	87.9752	92.2327	96.126	100.152
Fo	83.3788	83.4139	83.4197	83.4127	83.4293	83.4634	83.4594	83.3918	83.3316	83.2801	83.1397	83.0027	82.7946	82.5773	82.2042	81.726	81.0821	80.2506	79.2014	78.0103	76.88	75.3875	73.6266	71.2015	68.2414	64.3346
NiO	0.279753	0.279972	0.279354	0.277444	0.287339	0.280969	0.280483	0.278685	0.277408	0.273143	0.273619	0.265387	0.264415	0.258309	0.249584	0.240815	0.244405	0.231384	0.221981	0.211109	0.18975	0.172079	0.152945	0.116732	0.094835	0.08447
Kāohikaipu 4
x (µm)	0	8.03274	16.0352	24.0848	31.9424	39.9994	47.8831	56.1832	64.0888	72.0424	80.0677	88.0289	96.0543	104.104	111.969	119.875	127.95	136.035	144.06	152.066	160.076	167.934	176.055	184.138	192.044	200.189	208.126	216.055	224.105	232.137	240.163	248.116	255.949	263.886	271.935	280.01
Fo	83.9963	84.072	84.0704	84.1794	84.1971	84.1978	84.2618	84.2723	84.2456	84.3043	84.294	84.2892	84.2909	84.2774	84.2303	84.2265	84.1889	84.122	84.1014	84.0059	83.9546	83.6663	83.7225	83.5947	83.4752	83.2244	83.1065	83.0183	82.763	82.3663	81.7195	80.0686	75.4915	64.7365	24.0173	71.546
NiO	0.277677	0.275031	0.277675	0.277304	0.278114	0.27898	0.287143	0.284277	0.27805	0.281841	0.282683	0.280139	0.282098	0.281147	0.28376	0.284193	0.281159	0.284777	0.277538	0.276035	0.270594	0.271305	0.270707	0.269692	0.26187	0.251327	0.245903	0.23571	0.232597	0.223185	0.215404	0.187098	0.147205	0.068011	0.006549	0.014115
Kāohikaipu 5
x (µm)	0	4.96629	9.88976	14.8919	19.9902	24.8701	29.7901	34.9781	40.0345	44.9964	50.0124	55.0692	59.8638	64.9629	69.8881	75.0334	80.4923	85.0579	90.0669	95.1232	100.132	104.963	110.11	114.958	120.015	125.113	130.033	135.092	145.193	150.073	155.126	160.051	165.013	170.029	175.083	180.052	185.194	189.988	194.95	200.228	205.105	210.203	215.127	220.136	225.054	230.291
Fo	79.4037	79.3648	79.4102	79.3763	79.3974	79.3329	79.3251	79.3824	79.3394	79.3356	79.3005	79.3117	79.3968	79.3598	79.4103	79.4644	79.5023	79.5817	79.2446	79.5273	79.6063	79.6109	79.7008	79.7893	79.8187	79.9044	79.9579	80.0359	80.1198	80.1972	80.2725	80.3822	80.4634	80.5394	80.5863	80.7026	80.7901	80.8582	80.9051	80.9442	80.7538	80.1031	78.5678	75.8139	72.2827	68.7853
NiO	0.215434	0.20924	0.208546	0.208224	0.206325	0.205988	0.206362	0.205134	0.204552	0.203316	0.203354	0.208608	0.204453	0.203818	0.206988	0.202689	0.203897	0.199079	0.20095	0.206448	0.200059	0.206887	0.201094	0.198685	0.200332	0.198533	0.19898	0.197965	0.204104	0.199871	0.198195	0.204874	0.200238	0.199671	0.20207	0.204405	0.206654	0.205928	0.206314	0.202112	0.200363	0.193447	0.182679	0.147551	0.124637	0.105288
Kāohikaipu 6
x (µm)	0	8.10372	16.1565	24.2673	32.1441	40.0696	48.082	56.234	64.159	72.1715	80.1839	88.109	96.2609	104.322	112.161	120.086	128.277	136.252	144.264	152.276	160.289	168.218	176.318	184.293	192.305	200.23	208.382	216.22	224.32	232.381	240.258	248.287	256.34	264.401	272.278
Fo	84.7682	84.7843	84.8014	84.7971	84.8026	84.813	84.8011	84.7945	84.7783	84.741	84.7562	84.7234	84.7214	84.6773	84.6209	84.5999	84.5366	84.4462	84.3718	84.2553	84.1208	84.0293	83.841	83.69	83.4585	83.2162	82.9942	82.8052	82.4905	81.9669	80.7366	78.2293	72.8523	66.8977	72.9748
NiO	0.305682	0.300614	0.307695	0.313234	0.308205	0.314166	0.309531	0.308856	0.30558	0.309708	0.30461	0.30847	0.308787	0.305978	0.302617	0.300567	0.300353	0.300711	0.29968	0.294191	0.29005	0.282191	0.278926	0.269407	0.270126	0.268385	0.262399	0.256356	0.244	0.233187	0.220477	0.196903	0.146648	0.006579	0.01671
Kāohikaipu 7
x (µm)	0	5.99261	12.0158	18.036	24.0807	29.9897	35.9813	42.0823	48.2124	54.1214	60.1098	66.0188	72.0104	78.0551	84.0211	90.0127	96.0873	102.188	108.043	114.147	120.08	126.072	132.119	138.139	144.298	150.152	156.032	162.108
Fo	84.7289	84.6867	84.7032	84.6482	84.5776	84.5155	84.4161	84.3219	84.1662	84.0672	83.8911	83.7579	83.5638	83.404	83.1398	82.9834	82.7346	82.5114	82.3715	82.2019	82.0498	81.8828	81.4247	78.4087	64.5102	17.3706	8.45159	15.032
NiO	0.3546	0.352181	0.348445	0.351637	0.347712	0.347374	0.347456	0.35034	0.347098	0.340478	0.33566	0.32964	0.330006	0.324122	0.312656	0.308304	0.291161	0.272984	0.269135	0.262999	0.250986	0.244499	0.243771	0.222609	0.137289	0.028469	0.042011	0.037183
Kāohikaipu 8
x (µm)	0	7.89062	16.0389	23.9658	31.9402	39.8653	47.9283	55.9045	63.8789	71.9808	79.7329	87.9322	95.9934	103.97	111.982	119.996	127.921	135.896	144.095	151.986	159.862	167.925	175.813	183.915	191.94	199.954	207.831	215.944	223.918	231.932	239.907	247.832	255.895
Fo	84.8502	84.7828	84.7825	84.769	84.8078	84.8253	84.8628	84.7974	84.8241	84.7471	84.7289	84.6917	84.5774	84.448	84.3544	84.1734	83.9834	83.818	83.5572	82.8603	83.3362	82.9703	82.7748	82.5775	82.3861	82.2024	82.0577	81.9322	81.6572	78.5626	64.2446	17.7983	14.9154
NiO	0.33176	0.33352	0.334363	0.329525	0.332486	0.33185	0.338409	0.331047	0.331856	0.328807	0.330835	0.329653	0.32999	0.328819	0.322604	0.318947	0.320284	0.305993	0.299319	0.289846	0.287438	0.284004	0.270896	0.264842	0.251611	0.240922	0.240338	0.23253	0.227814	0.211183	0.103462	0.018591	0.021942
Kāohikaipu 10
x (µm)	0	4.89225	9.99255	15.0729	19.9586	25.0652	29.9901	35.0135	40.0898	45.0522	49.9054	55.0392	59.9764	65.0047	70.1113	75.1015	79.9023	85.0908	90.2004	95.0003	100.081	115.175	120.172	125.217	130.076	135.204	140.143	145.082	150.11	155.132	160.183
Fo	81.2805	81.2741	81.3069	81.3218	81.4049	81.3485	81.3412	81.3458	81.6513	81.6561	81.7251	81.7197	81.7861	81.8487	81.9097	81.9212	81.8978	81.8536	81.7359	81.4163	80.8848	79.9504	78.5307	77.0596	75.1627	72.7569	68.9402	62.0791	45.359	81.2915	81.2664
NiO	0.270055	0.269901	0.271473	0.270533	0.263405	0.266074	0.264443	0.260704	0.254274	0.250274	0.249103	0.246523	0.242922	0.239937	0.243534	0.240135	0.234323	0.226136	0.223557	0.219771	0.210027	0.200821	0.185505	0.162529	0.146002	0.132024	0.071732	0.045692	0.027971	0.269842	0.276166
Kāohikaipu 11
x (µm)	0	5.12555	10.1237	15.0641	20.1869	25.092	30.1991	34.9771	40.1622	45.048	50.2332	55.0453	60.0409	64.9812	70.1998	75.1401	80.0451	85.1143	90.0796	95.0199	100.053	105.048	110.081	115.079	119.984	125.092	130.057	135.164	140.035	145.068	150.009	155.098	160.096	165.001	170.034	175.066	180.174	185.013	190.175	194.987	200.112	205.015	210.013
Fo	84.2824	84.3	84.3551	84.4082	84.4084	84.4249	84.4342	84.4532	84.4669	84.5034	84.5024	84.5119	84.4921	84.481	84.4475	84.4407	84.4024	84.3181	84.2545	84.1744	84.1007	84.0109	83.8253	83.7047	83.5173	83.2518	83.0343	82.8424	82.605	82.3276	81.974	81.7426	81.4774	81.2142	81.0214	80.836	80.8121	80.7224	80.8296	80.6663	79.3517	74.9049	66.1856
NiO	0.30014	0.303379	0.302917	0.303931	0.305024	0.304285	0.302257	0.303447	0.304518	0.305652	0.305115	0.305484	0.302511	0.30327	0.305069	0.307155	0.30975	0.308726	0.304615	0.306687	0.299838	0.298833	0.292449	0.284011	0.282433	0.275177	0.272054	0.263894	0.253494	0.247294	0.234713	0.227998	0.207619	0.196835	0.181627	0.168934	0.170245	0.170193	0.181355	0.180197	0.191993	0.135684	0.082525
Kāohikaipu 12
x (µm)	0	5.06914	10.0465	15.0555	20.0715	25.2183	30.1586	35.082	40.0911	45.2448	50.1236	55.3292	60.1989	65.309	70.2342	75.381	80.1256	85.1819	90.2511	95.2206	100.29	105.249	110.318	115.327	120.396	125.234	130.201	135.308	140.285	145.341	150.308	155.229	160.206	165.542
Fo	84.555	84.5218	84.5175	84.4893	84.4692	84.4995	84.4825	84.4499	84.416	84.3872	84.3433	84.3054	84.2487	84.2065	84.0966	83.9891	83.9245	83.764	83.6266	83.42	83.2418	83.018	82.8465	82.6138	82.4713	82.3483	82.2052	81.9852	81.8656	81.7423	81.6292	81.4072	78.7371	68.879
NiO	0.311506	0.312201	0.309766	0.314456	0.313816	0.30931	0.310901	0.30803	0.309477	0.307458	0.307443	0.305893	0.304075	0.30465	0.302451	0.299155	0.29563	0.294552	0.291294	0.288265	0.283912	0.277961	0.274148	0.26604	0.263114	0.247513	0.23769	0.230184	0.222891	0.213941	0.206522	0.182554	0.176411	0.119259
[truncated: 33 more columns]
